# Supplementary material for: Lessons for the organization of nuclear decommissioning from the UK and the US: risks, challenges, and opportunities
Source: Copernicus journal article supplement (doi:10.5194/sand-2-7-2023), 2023-09-06
Supplement: Supplementary file 1 [file sand-2-7-2023-supplement.pdf]

Supplement of Saf. Nucl. Waste Disposal, 2, 7–8, 2023  
<https://doi.org/10.5194/sand-2-7-2023-supplement>  
© Author(s) 2023. CC BY 4.0 License.

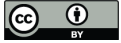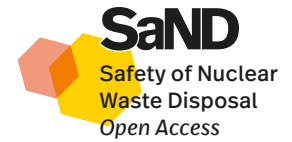

*Supplement of*

## **Lessons for the organization of nuclear decommissioning from the UK and the US: risks, challenges, and opportunities**

**Alexander Wimmers and Christian von Hirschhausen**

*Correspondence to:* Alexander Wimmers (awi@wip.tu-berlin.de)

The copyright of individual parts of the supplement might differ from the article licence.

safeND, Berlin  
14 September 2023

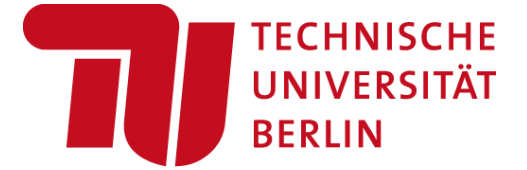

# Lessons for the Organization of Nuclear Decommissioning from the UK and the US: Risks, Challenges, and Opportunities

Alexander Wimmers<sup>1,2</sup> and Christian von Hirschhausen<sup>1,2</sup>

1: Workgroup for Infrastructure Policy (WIP), Technische Universität Berlin (TU Berlin), Germany

2: German Institute for Economic Research (DIW Berlin), Germany

**1** Motivation

**2** System Good Nuclear Decommissioning

**3** Case Studies

**4** Conclusion

**1** Motivation

**2** System Good Nuclear Decommissioning

**3** Case Studies

**4** Conclusion

# Nuclear Decommissioning

## Relevance of Nuclear Decommissioning

- Assuming a 40-year lifetime, many reactors built in the 1980s will begin shutting down in the coming years
- All of these reactors will have to be decommissioned at some point
- Lifetime extensions (50, 60 or 80 years) can only push this inevitability into the future

### Distribution of Global Nuclear Reactor Startups and Shutdowns

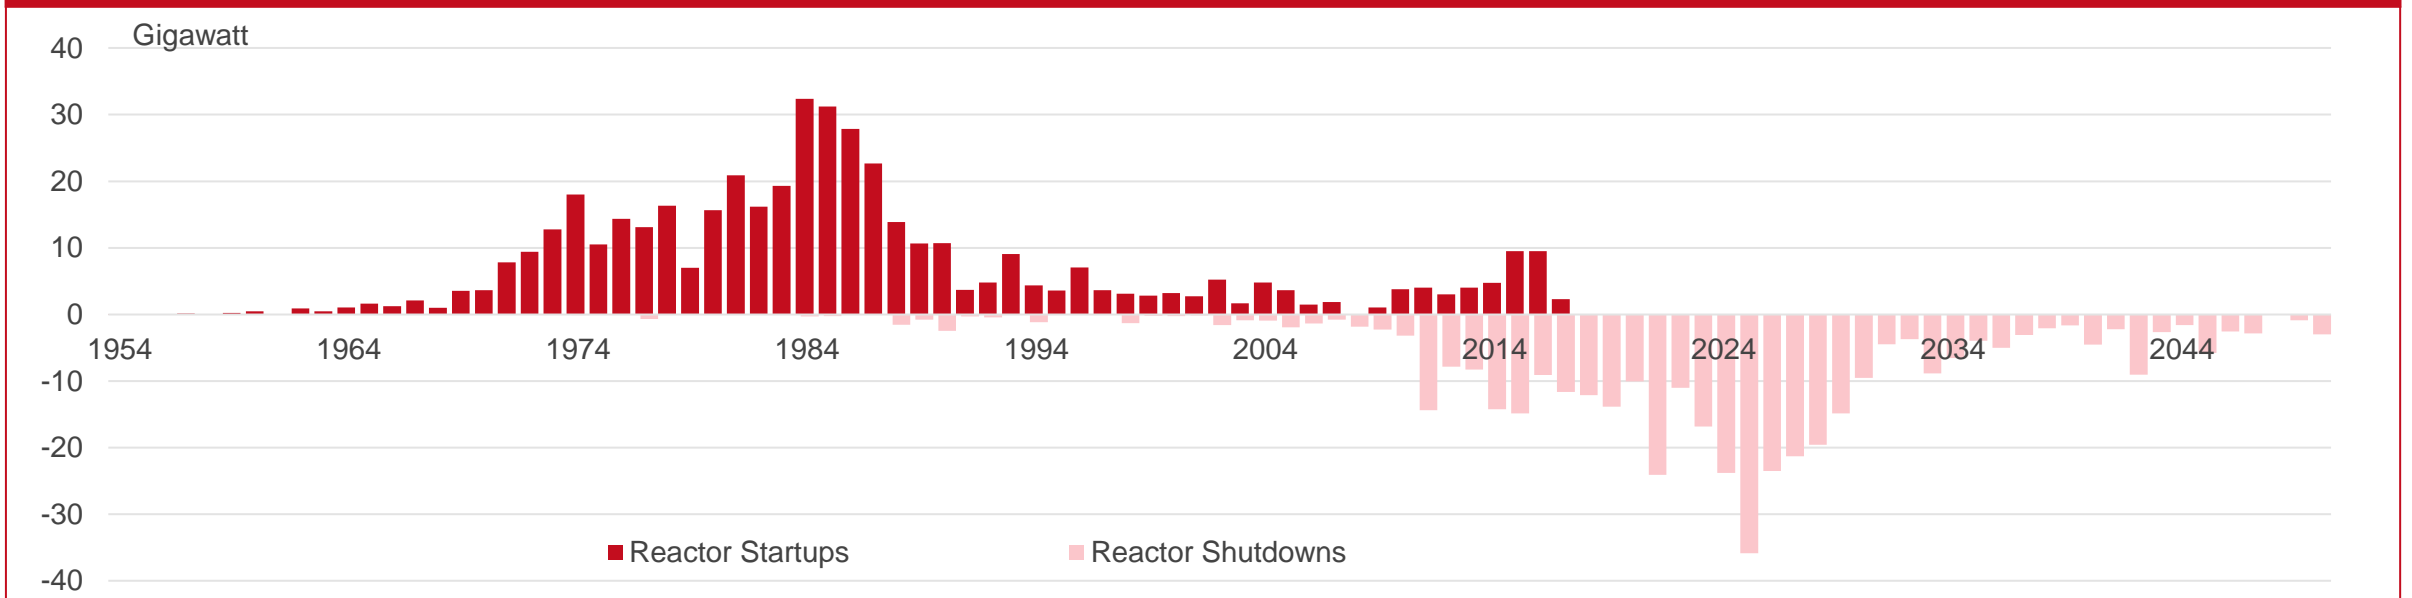

Taken from Wealer et al. (2018).

# Nuclear Decommissioning

## Status of Nuclear Decommissioning Projects Worldwide

As of June 2022, 204 nuclear reactors were closed world-wide. Of these, only 22 reactors have been fully decommissioned. 120 are undergoing some form of active decommissioning, while 52 are in so-called “longterm enclosure”.

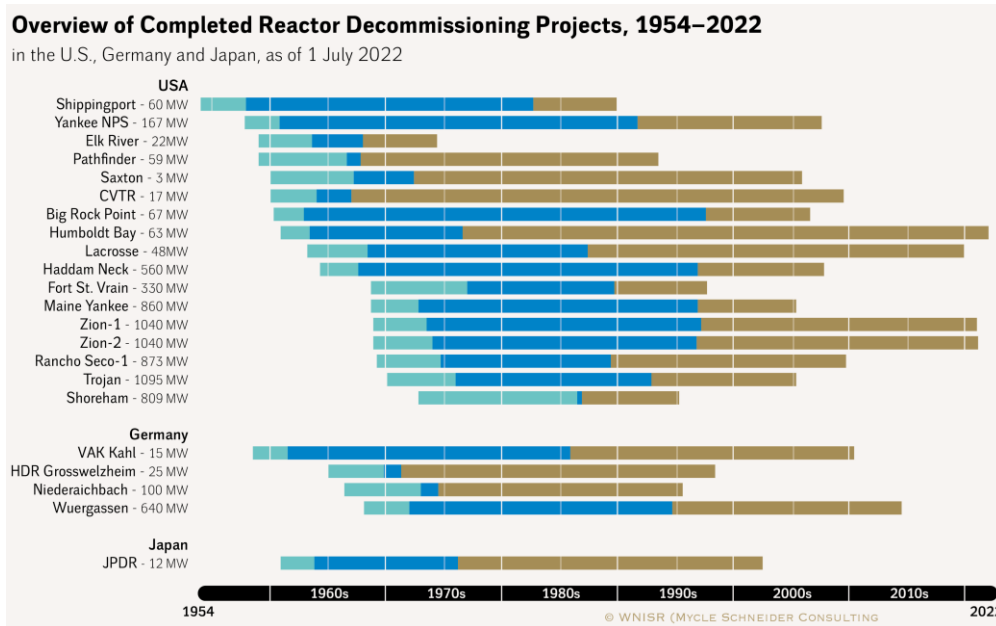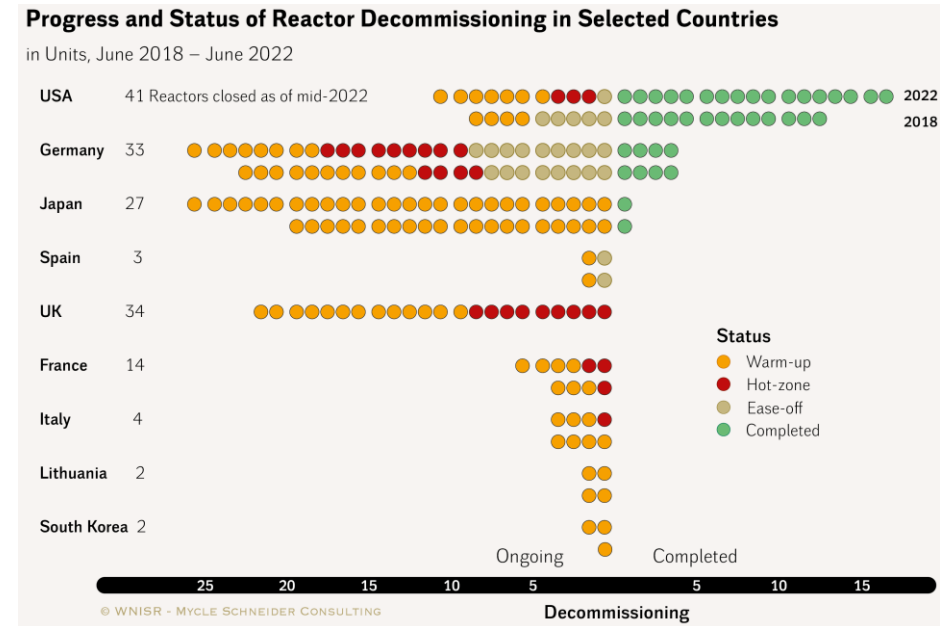

The **nuclear industry** is **inexperienced** in decommissioning – and regulation differs amongst various countries. As the relevance of decommissioning will only increase in the future, we ask whether “**best practice**” **organizational models** can be identified?

Taken from Schneider et al. (2022)

**1** Motivation

**2** System Good Nuclear Decommissioning

**3** Case Studies

**4** Conclusion

# System Good Analysis

## Methodological Framework by Beckers et al. (2012)

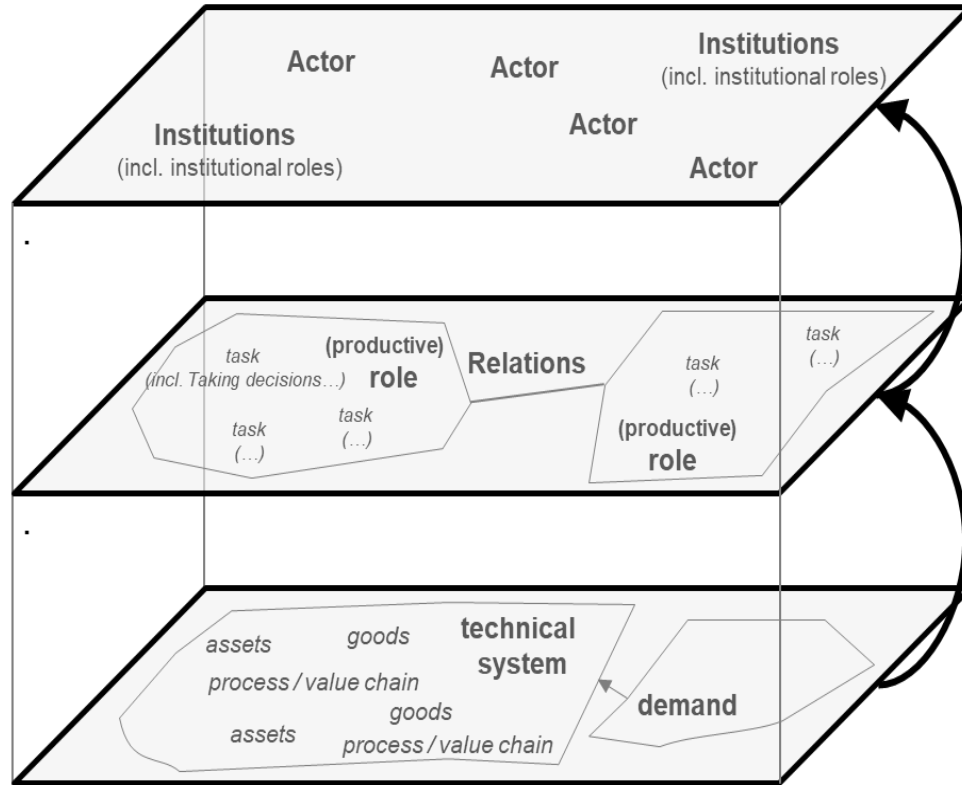

- The framework was developed for the implementation or the supply of so-called “system goods”.
- A system good is a complex good or service, that often includes the supply of a variety of services, which must be produced upstream or offered in parallel.
- This complex web of goods and services involves a variety of actors, which results in the need for coordination between these actors.
- The framework was developed by the team around Prof. Beckers of the TU Berlin in the stream of new institutional economics.

Source: Beckers et al. (2012)



# System Good Nuclear Decommissioning Technical System

*Decommissioning refers to the administrative and technical actions taken to remove all or some of the regulatory controls from an authorized facility so the facility and its site can be reused. Decommissioning includes activities such as **planning, physical and radiological characterization, facility and site decontamination, dismantling, and materials management.** - IAEA*

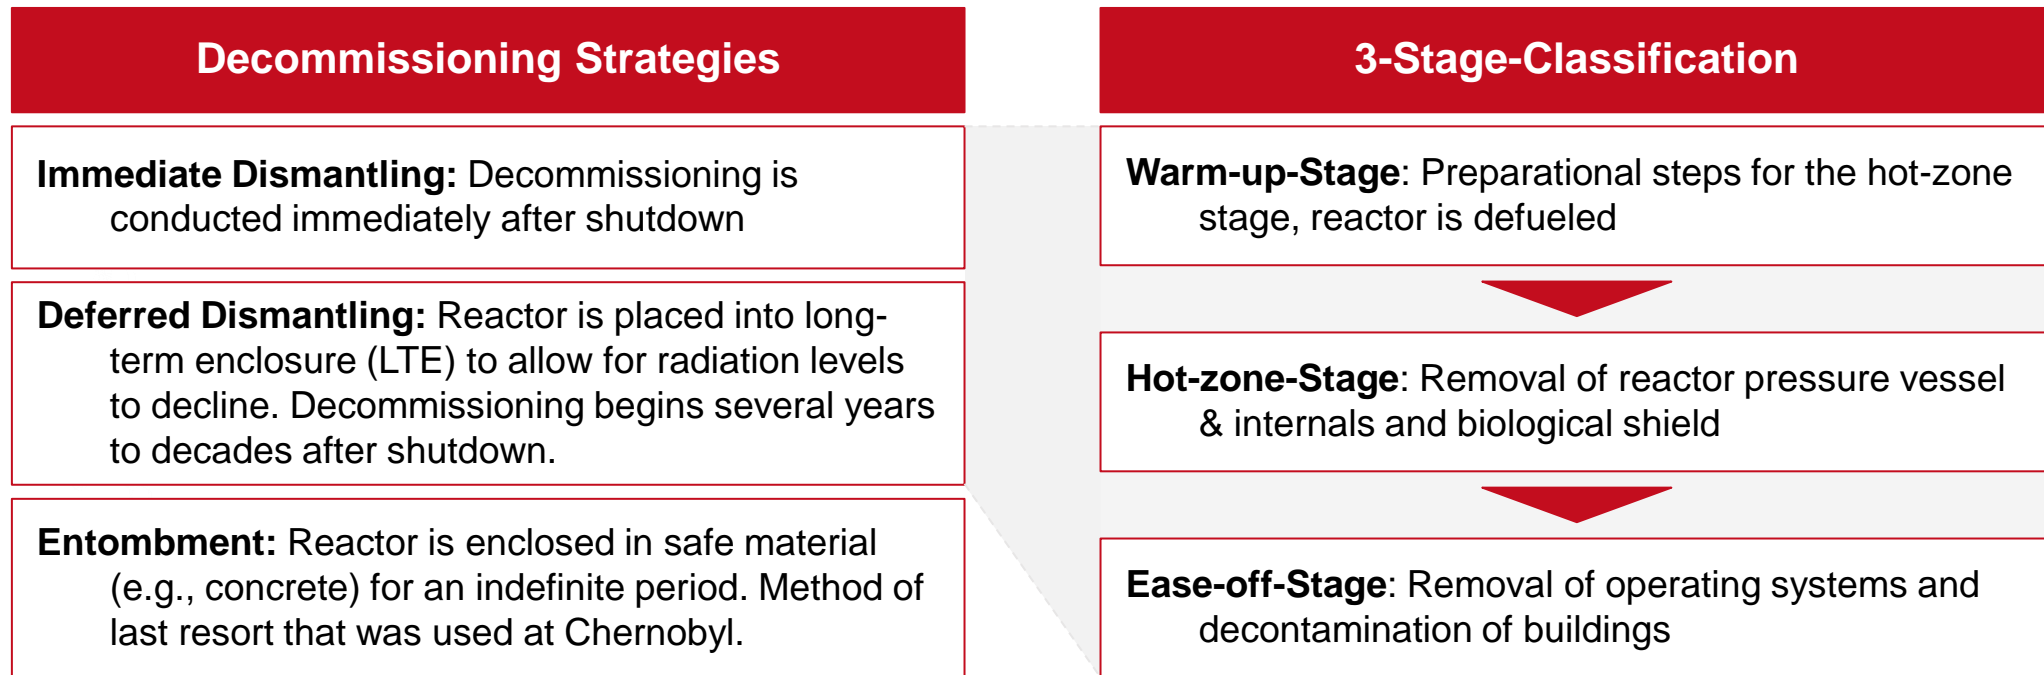

Sources: Wimmers et al. (2023), IAEA (205), Irrek (2019), Park et al. (2022)

# System Good Nuclear Decommissioning Processes and Assets

Nuclear decommissioning consists of many **interdependent**, highly **complex processes** that, depending on the stage, require certain assets.

Decommissioning is characterized by **high uncertainty** (e.g., unknown contamination of buildings) and **asset specificity** (e.g., use of specialized tools and diverse nuclear fleets).

Increased **frequency** of transactions is envisioned by the industry but remains **questionable** (e.g., can tools be safely reused?)

*Exemplary processes and assets:*

| Warm Up Stage                                                                                                                                                                                                                                                                                                                                                                       | Hot Zone Stage                                                                                                                                                                                                                                                                                                                                                                             | Ease Off Stage                                                                                                                                                                                                                                                                                                                                                                    |
|-------------------------------------------------------------------------------------------------------------------------------------------------------------------------------------------------------------------------------------------------------------------------------------------------------------------------------------------------------------------------------------|--------------------------------------------------------------------------------------------------------------------------------------------------------------------------------------------------------------------------------------------------------------------------------------------------------------------------------------------------------------------------------------------|-----------------------------------------------------------------------------------------------------------------------------------------------------------------------------------------------------------------------------------------------------------------------------------------------------------------------------------------------------------------------------------|
| <ul style="list-style-type: none"> <li>• Processes               <ul style="list-style-type: none"> <li>• Defueling of reactor core and spent fuel pools</li> <li>• Dismantling of first redundant systems</li> </ul> </li> <li>• Assets               <ul style="list-style-type: none"> <li>• Transport and storage casks</li> <li>• Decontamination tools</li> </ul> </li> </ul> | <ul style="list-style-type: none"> <li>• Processes               <ul style="list-style-type: none"> <li>• Dismantling of reactor pressure vessel and internals</li> <li>• Dismantling of cooling circuit</li> </ul> </li> <li>• Assets               <ul style="list-style-type: none"> <li>• Highly specific tools for dismantling (e.g., underwater manipulators)</li> </ul> </li> </ul> | <ul style="list-style-type: none"> <li>• Processes               <ul style="list-style-type: none"> <li>• Removal of operating systems</li> <li>• Demolition and decontamination of buildings</li> </ul> </li> <li>• Assets               <ul style="list-style-type: none"> <li>• Transport and storage casks</li> <li>• Disposal facility (or access to)</li> </ul> </li> </ul> |

Sources: Wimmers et al. (2023), Weinand (2022), Suh et al. (2018), Borchardt (2019), Wealer and von Hirschhausen (2020)

# System Good Nuclear Decommissioning

## Tasks, Roles, Actors (Production)

“a firm [has] [...] a role to play in the economic system if it [is] possible for a transaction to be organized within the firm at less cost than would be incurred if the same transaction were carried out through the market” – Coase (1988, 19)

In general, two approaches to the organization of nuclear decommissioning exist (Cacuci 2010).

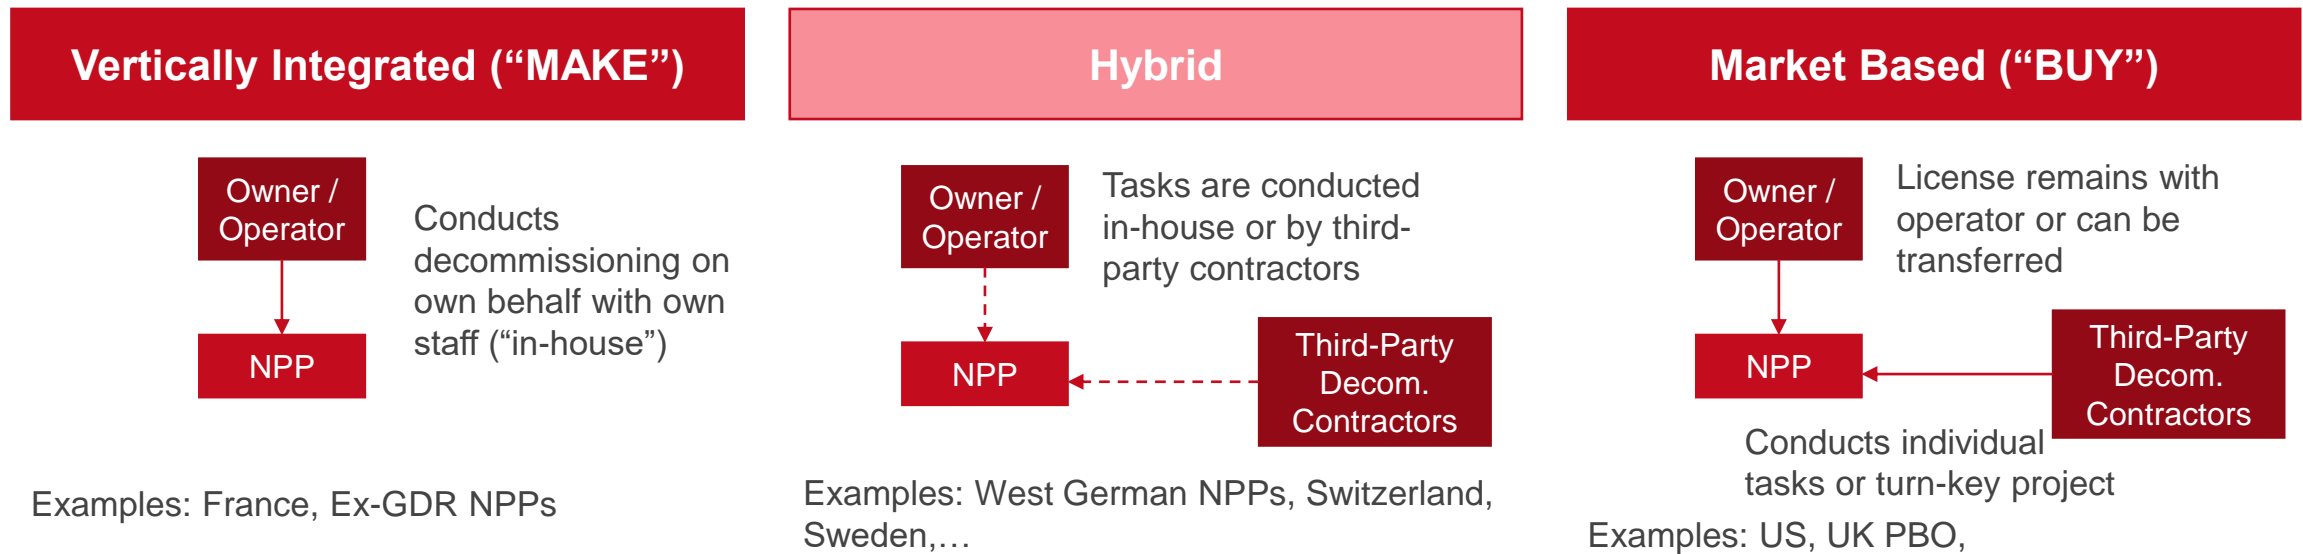

Sources: Wimmers (2023)

# System Good Nuclear Decommissioning

## Tasks, Roles, Actors (Financing)

### Public Budget

- Funds come from the government's budget
- Can sometimes go against "polluter-pays-principle"
- Examples: GDR decommissioning and UK legacy and AGR fleets

### Internal Segregated

- Nuclear plant licensees make payments to a fund which self-administered and -managed
- These funds are separated from other business interests and as ear-marked
- Example: France

### Internal Non-Segregated

- Funds are self-administered but need not necessarily be separated from other company business interests or assets
- Concerns about liquidity and sufficiency have been raised
- Examples: West German NPPs

### External Segregated

- Nuclear plant licensees make regular payments to an externally managed fund (or funds) that are completely separated from other assets
- Once this money is deposited, control over its use is lost
- Example: Switzerland (STENFO)

### Surety Methods (Guarantees)

- In the USA, licenses may use a several financial instruments (or a combination) including surety bonds, letters of credit, parent company guarantees, ...
- 30% of licensees use this approach, alone or in combination

Sources: Wealer, Seidel, and von Hirschhausen 2019; Moriarty 2021; STENFO 2020; Schneider et al. 2018; OECD/NEA 2006; 2016; Irrek 2019, Lordan-Perret et al. (2021)

**1** Motivation

**2** System Good Nuclear Decommissioning

**3** Case Studies

**4** Conclusion

# Nuclear Decommissioning in the United Kingdom & United States

## Progress over the last few years

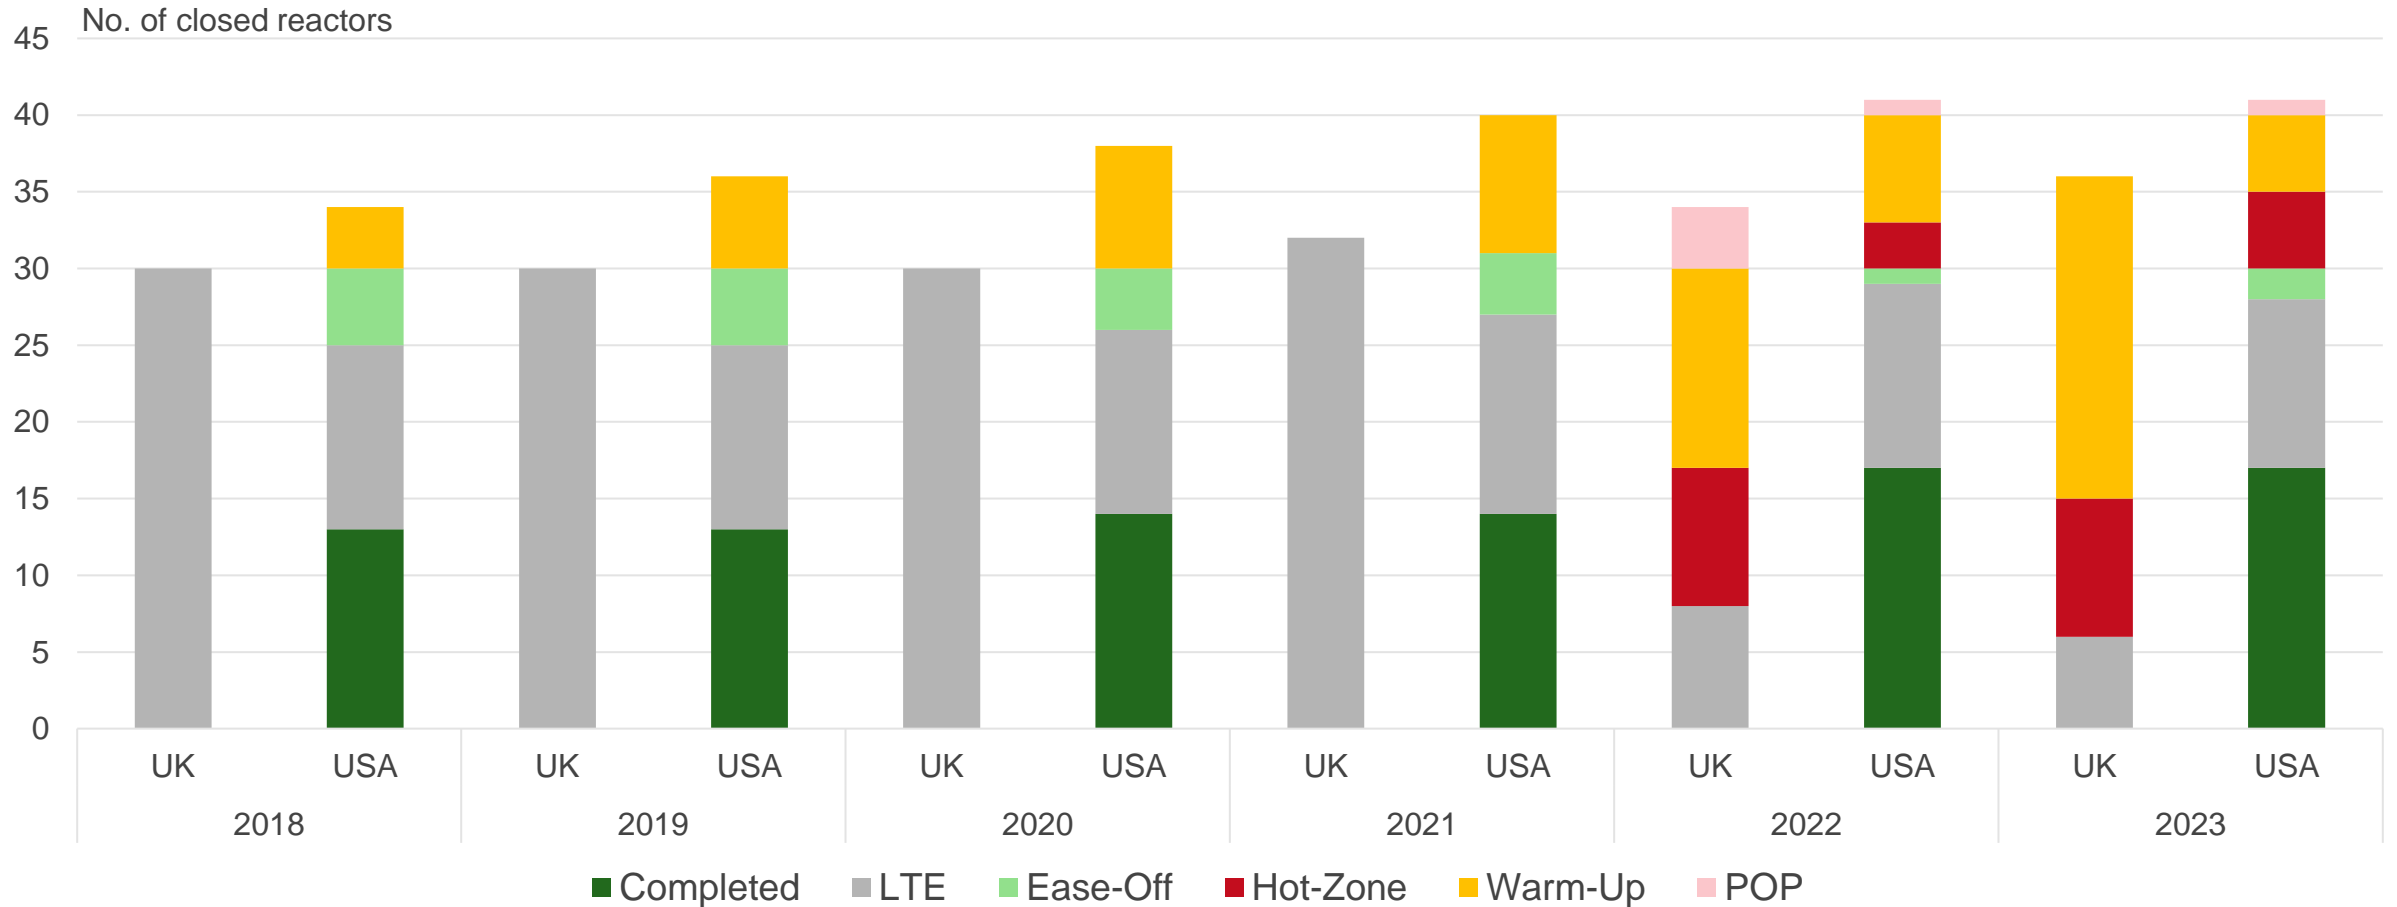

POP = Post-operational phase (short-term phase directly after shutdown before decommissioning begins, i.e. due to lack of licenses)

Sources: Schneider et al. (2018, 2019, 2020, 2021, 2022), For 2023: Own compilation of various sources.

# Nuclear Decommissioning in the United Kingdom

## Timelines

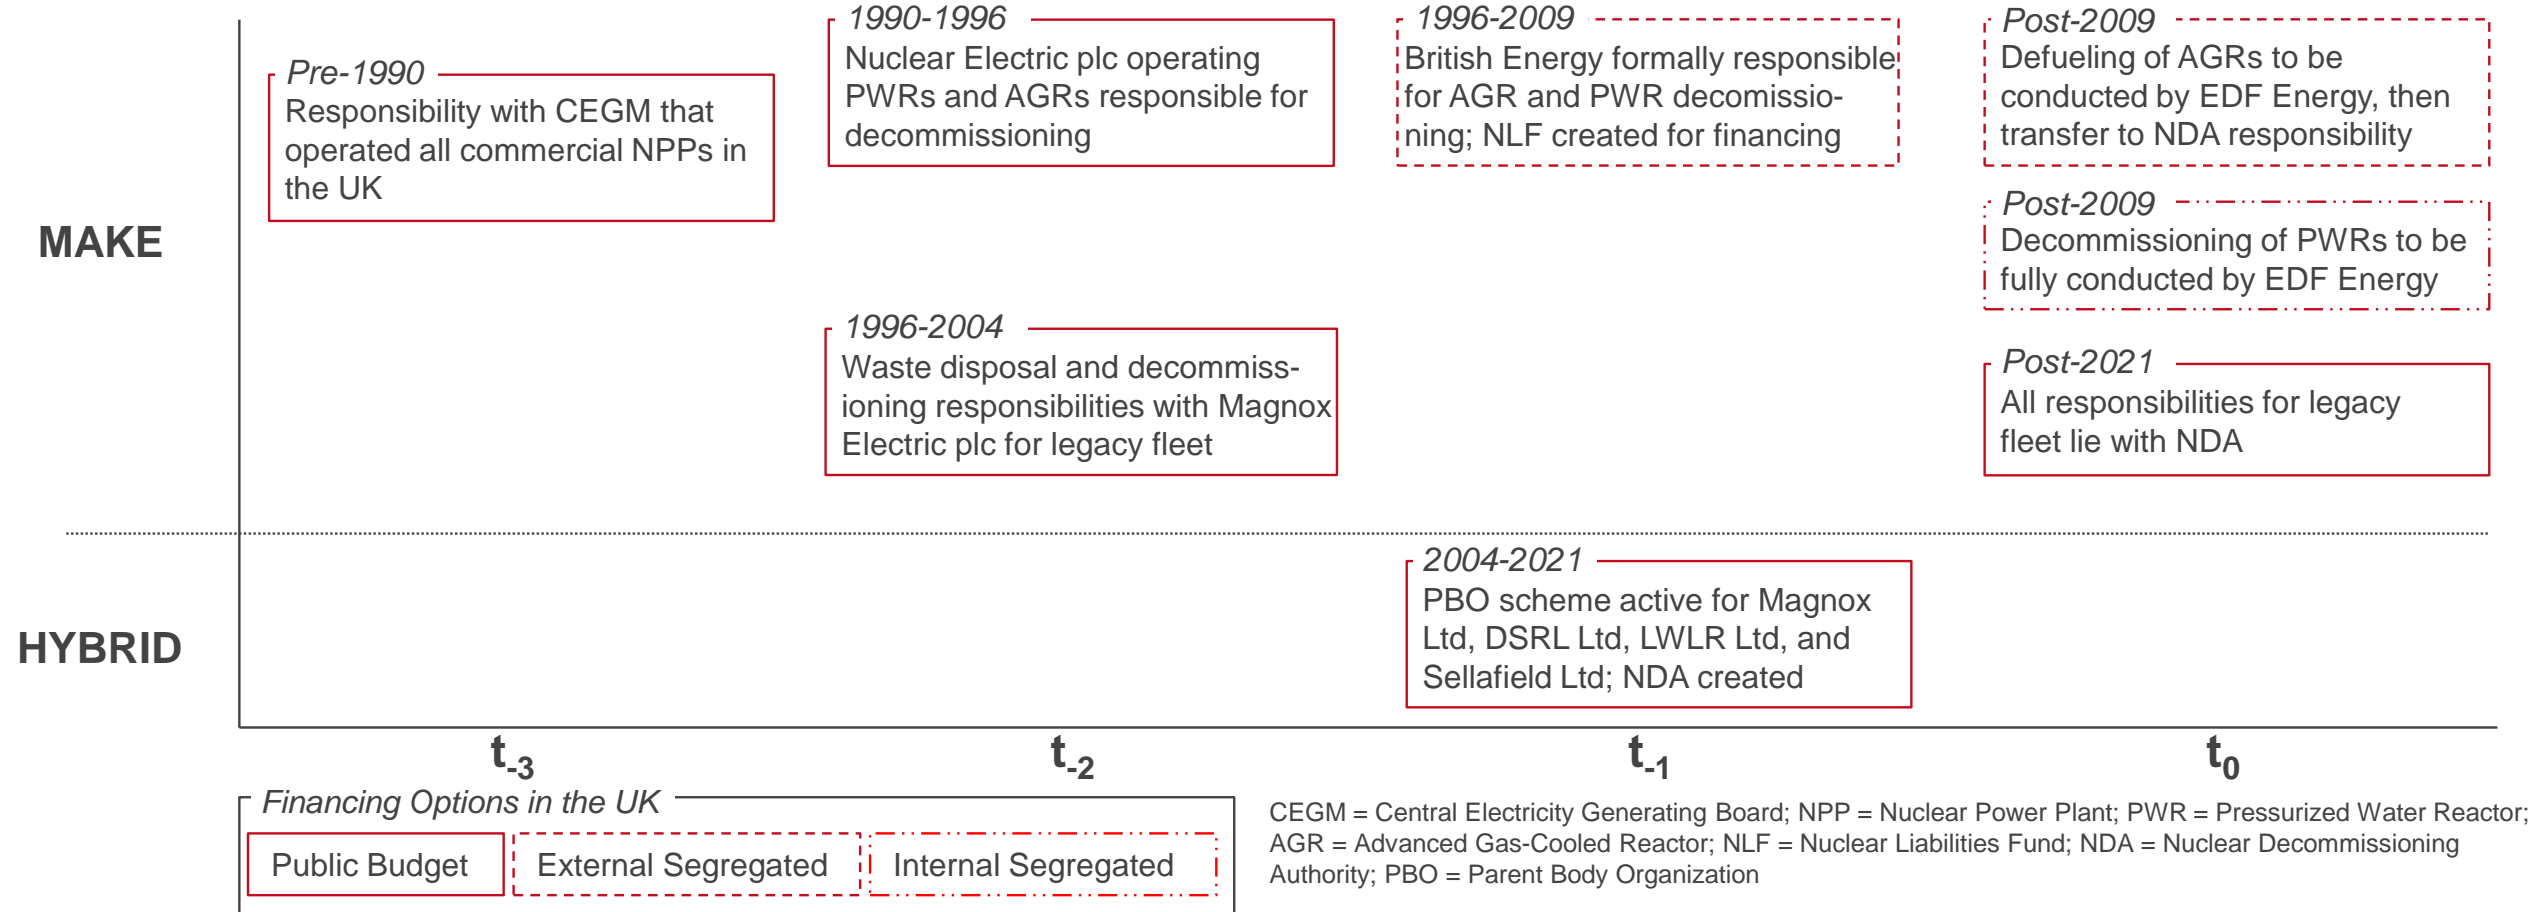

Sources: Rhodes et al. (2014), Hood (1995), Foster et al. (2021), Wimmers et al. (2023), MacKerron (2015), Lal (2013), Haraldsen (2018), Holliday (2021), NDA (2021), House Of Commons (2020) and others.

# Nuclear Decommissioning in the United Kingdom

## Parent-Body-Organization

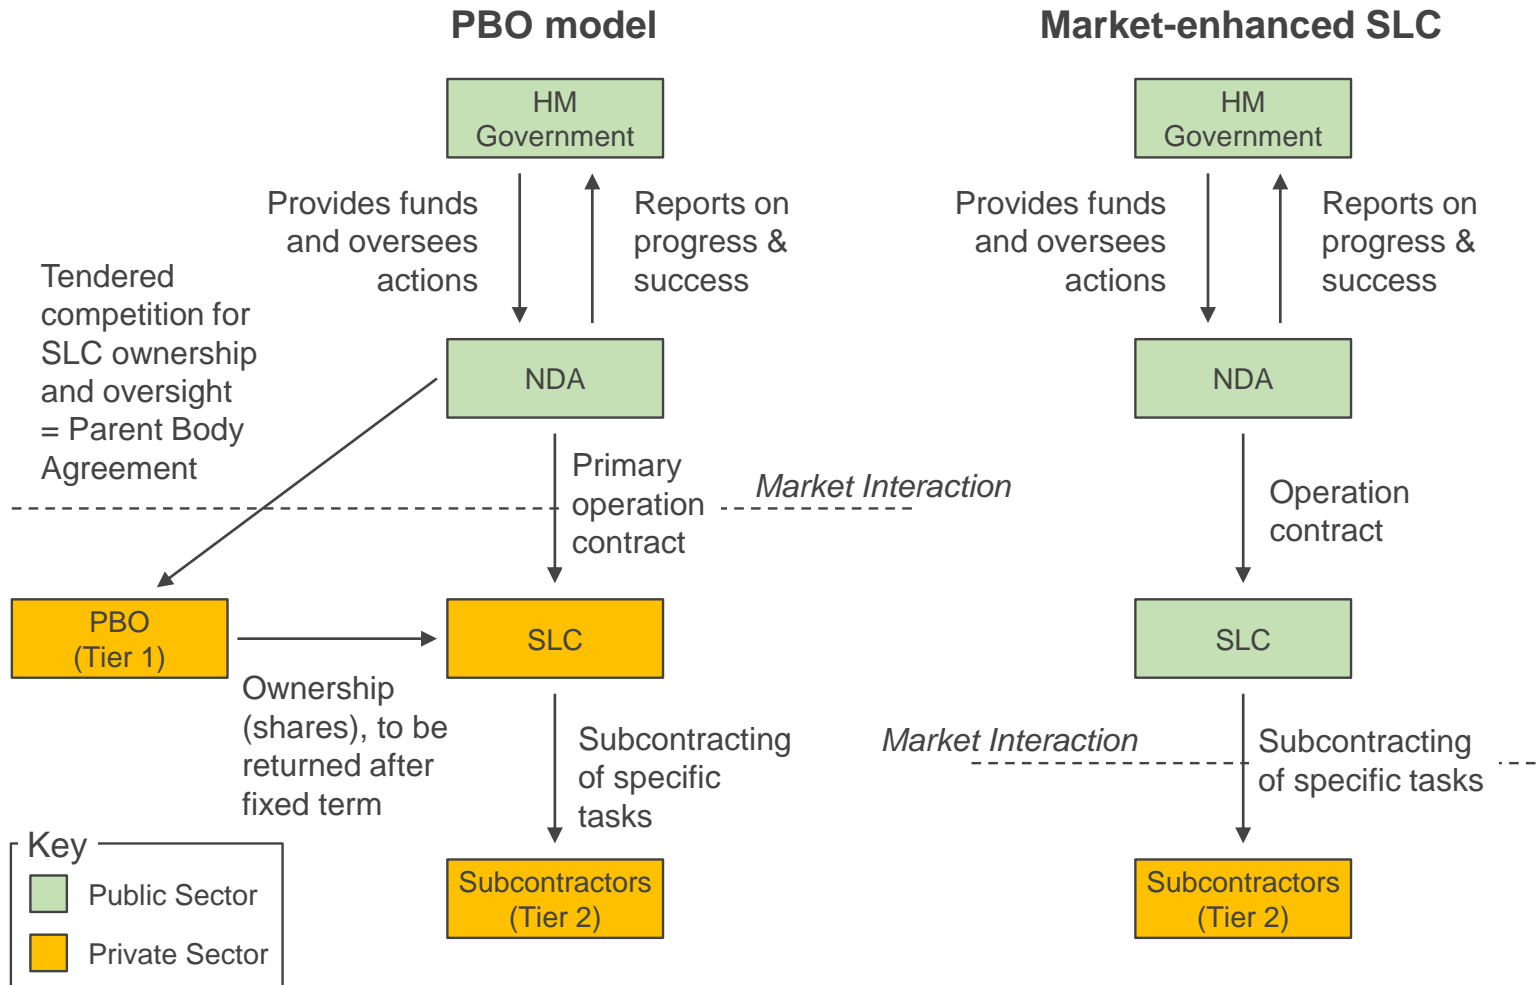

- From 2004 onwards, the UK introduced the “Parent-Body-Organization” (PBO) model to nuclear decommissioning
- The goal was to introduce competition to nuclear decommissioning while keeping (financial) liabilities for decommissioning and waste management with the state
- After initial efficiency gains, the scheme was retracted in steps for all nuclear assets as inefficiencies became apparent
- Today, the UK’s decommissioning industry is fully vertically integrated

Sources: MacKerron (2012), NDA (2014)



# Nuclear Decommissioning in the United Kingdom

## Reasons for PBO Failure

### Information Asymmetry

- PBOs were able to exploit lack of knowledge/oversight of NDA
- Opportunistic behavior resulted in focus on short-term efficiency gains to earn fees, but long-term investments were not made (e.g., Sellafield)

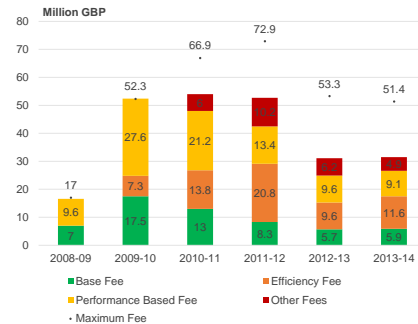

### Complexity and Uncertainty

- Nuclear decommissioning was considered with less priority in the UK until the early 2000s
- By then, information on waste had been lost or radioactive waste sludge had formed
- Early GCRs are complex to decommission due to underground structures and contamination from radioactive gas

### Transaction Costs

- Reimbursable contracts were replaced by Target-cost based contracts that required extensive monitoring to set the baseline; complicated by information asymmetry between NDA and (former) PBOs
- Monitoring of progress for fee payments highly complex
- Tendering highly complex and evaluation of bids difficult

### Asset Specificity

- UK legacy fleet is highly diverse, various reactor types, models and designs; an initially adopted blanket strategy was abandoned and now site-specific approaches are tested
- Sellafield is the most complex site in the UK (and possibly Europe) which required individualized approaches



# Nuclear Decommissioning in the United States

## Two “new” organizational models have emerged

### Operation and Conventional Decommissioning

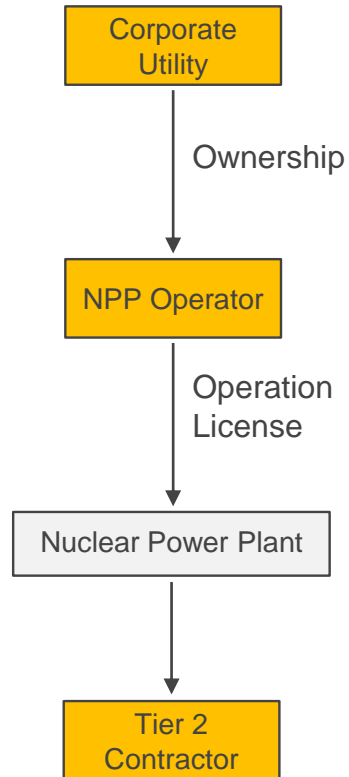

### License Acquisition

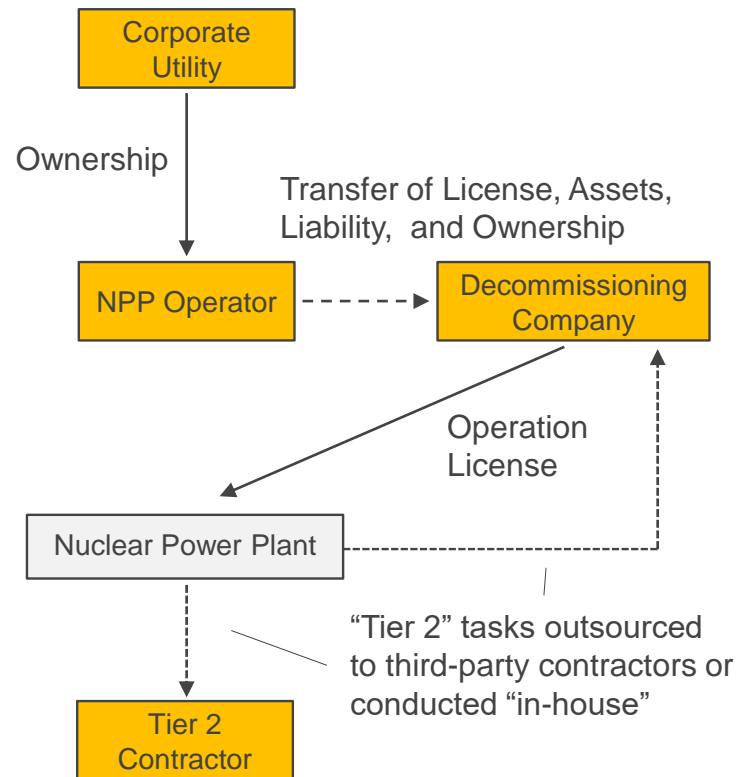

### License Stewardship

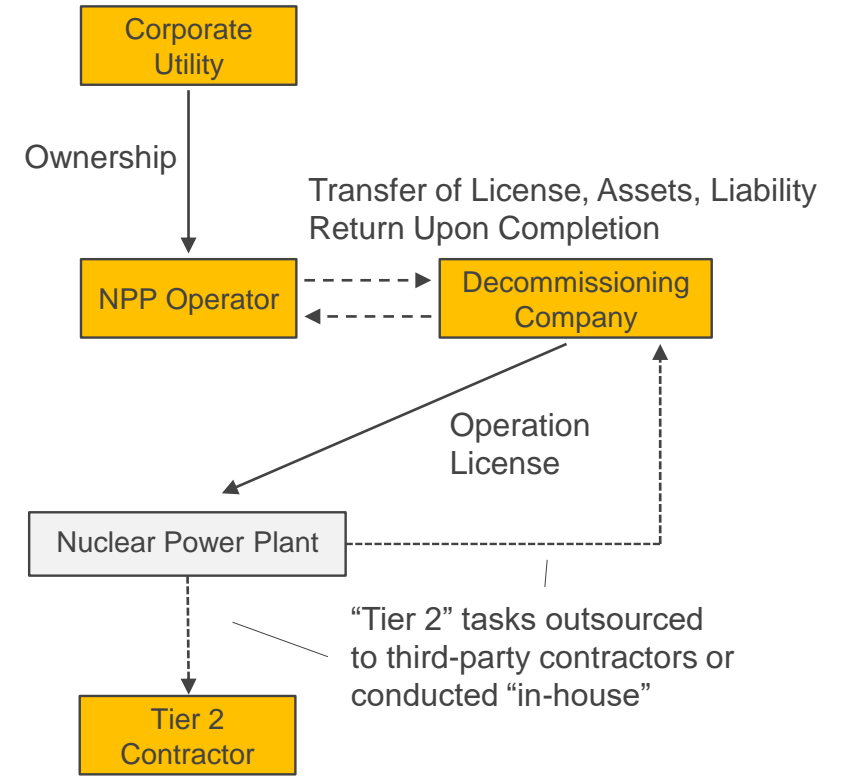

# Nuclear Decommissioning in the United States

## License Stewardship and Acquisition Case Studies

### License Stewardship

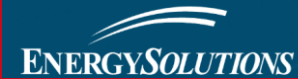

- EnergySolutions has international experience in nuclear decommissioning (former PBO in UK!)
- Leverages extensive asset base for decommissioning (low-level waste, waste processing, transportation, logistics)
- Completed decommissioning of Zion 1-2 and LaCrosse. Ongoing work at TMI-2 and Kewaunee
- Decommissioning of Zion completed within 13 years (2007-2020)
- Possibly Incentivized by access to Decommissioning Trust Fund and provision of waste removal route

### License Acquisition

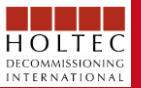

- All-inclusive fuel management contracts across U.S. and globally (wet and dry storage, ISFSI construction, spent fuel loading services)
- Supplier of NRC licensed dry cask storage
- Decommissioning subsidiary (HDI) currently overseeing decom at four NPPs (latest Palisades\*)
- Ongoing plans for consolidated interim waste storage facility in New Mexico ~ legal challenges
- However, unclear on the financial motivation as (officially) excess cash in DTFs must be returned to rate payers (except for Indian Point)

\*Palisades might be restarted, ongoing discussions with regulators and state government.

# Nuclear Decommissioning in the United States

## Possible benefits?

### Information Asymmetry

- With license stewardship, information asymmetry remains, as the original licensee might face opportunistic behavior by steward
- With license acquisition however, information asymmetry risks are eliminated as responsibility is transferred to new licensee (shirking risk reduced!)

### Complexity and Uncertainty

- By directly decommissioning NPPs and directly employing former operational staff, uncertainty is reduced on-site
- However, risks remain that highly complex sites will not be decommissioned by profit-maximizing decommissioning firms as DTF funds might not suffice

### Transaction Costs

- Transaction costs are reduced significantly through the turn-key approach and unlimited contracts -> monitoring costs are reduced for the original licensee
- Costs of discovery remain (DTF + physical state of site)
- Several license transfers might however increase need for regulatory oversight and scrutiny as profit-maximizing firms might attempt at “cutting corners”

### Asset Specificity

- The US fleet is somewhat homogeneous (mostly LWRs, of which 2/3 PWR); models and generations still vary and pose uncertainties
- Also the ownership structure is highly diverse
- Deregulated and regulated markets could hinder model implementation

# Nuclear Decommissioning in the United States

## Opportunities and Risks for International Decommissioning Industry

These models can only function in the US because some necessary conditions are met (Stenger et al. (2019)):

- Flexible license transfer mechanisms
- Plant-specific nuclear decommissioning trust funds
- (financial) waste management responsibilities pooled with the US federal government

### Opportunities

- Faster decommissioning reduces safety and security risks and possible reduces cost and sites can be reused for other (industrial) purposes
- Efficiency gains and learning might benefit future decommissioning projects as standardization and new technologies are implemented and might be implemented elsewhere!
- Clearly defined waste management pathways

### Risks

- Profit-maximizing actors might cut corners in terms of security and safety
- Plants with limited DTF funds, high uncertainty or asset specificity might not be viable for model and might have to be “cleaned up” by final liability holder, which could be the state (or other actor)
- secure interim waste storage pathways limit the necessity to provide final solution

**1** Motivation

**2** System Good Nuclear Decommissioning

**3** Case Studies

**4** Conclusion

## Conclusion

Nuclear decommissioning is highly complex, asset specific and underlies severe uncertainty. This limits the widespread implementation of “universal” organizational models in different countries and results in the emergence of individual designs. **But can these be applied to other countries?**

The UK’s PBO model failed due to bad governance and lack of oversight and the high transaction costs resulting from the legacy fleet’s complexity and underlying uncertainty. Returning to a more vertically integrated approach might increase efficiency for this case.

In the US, “new” organizational models might result in increased efficiency for some more standardized reactor fleets, while others could fall behind.

Preconditions for these models to function are flexible license transfer mechanisms, plant-specific financing, (somewhat) resolved waste management responsibilities, a capable nuclear decommissioning industry, and others (subject to future research).



# References

- Bah, Muhammad Maladoh. 2023. "The United States Nuclear Power Industry Decommissioning Profile." WWZ Working Paper. University of Basel. <https://edoc.unibas.ch/93044/>.
- Beckers, Thorsten, Florian Gizzi, and Klaus Jäkel. 2012. "An Approach to Analyze 'System Goods'- Classification, Presentation, and Application." 2021–02. WIP-Working Paper. Berlin: Workgroup for Infrastructure Policy (WIP), Technische Universität Berlin.
- Borchardt, Ralf. 2019. "Stilllegung und Rückbau von Kernkraftwerken in Deutschland." In *Kernkraftwerke - Denkmalwerte und Erhaltungschancen*, edited by Sigrid Brandt and Thorsten Dame, 1st ed., 45–54. Internationale Fachtagung der Technischen Universität Berlin, Fachgebiet Historische Bauforschung und Baudenkmalpflege, und des Deutschen Nationalkomitees von ICOMOS in Kooperation mit der Deutschen Sektion von TICCIH und der Stiftung Deutsches Technikmuseum Berlin. ICOMOS - HEFTE DES DEUTSCHEN NATIONALKOMITEES. <https://journals.ub.uni-heidelberg.de/index.php/icomoshefte/article/download/74525/68213>.
- Borenstein, Severin, and James Bushnell. 2015. "The US Electricity Industry After 20 Years of Restructuring." *Annual Review of Economics* 7 (1): 437–63. <https://doi.org/10.1146/annurev-economics-080614-115630>.
- Clarke, John. Letter to Stephen Lovegrove, Permanent Secretary of the Department of Energy and Climate Change. 2014. "Implementing Market Enhanced SLC at Sellafield," December 17, 2014. <https://webarchive.nationalarchives.gov.uk/ukgwa/20211004154252/https://rwm.nda.gov.uk/publication/letter-to-stephen-lovegrove-permanent-secretary-from-john-clarke-nda-ceo-on-implementing-market-enhanced-slc-at-sellafield-17-december-2014/>.
- Davis, Lucas W., and Catherine Wolfram. 2012. "Deregulation, Consolidation, and Efficiency: Evidence from US Nuclear Power." *American Economic Journal: Applied Economics* 4 (4): 194–225. <https://doi.org/10.1257/app.4.4.194>.
- Department of Trade and Industry. 2002. "Managing the Nuclear Legacy - A Strategy for Action." cm 5552. London. <https://webarchive.nationalarchives.gov.uk/ukgwa/+http://www.dti.gov.uk/nuclearcleanup/ach/whitepaper.pdf>.
- Foster, Richard I., June Kyung Park, Keunyoung Lee, and Bum-Kyoung Seo. 2021. "UK Civil Nuclear Decommissioning, a Blueprint for Korea's Nuclear Decommissioning Future?: Part I - Nuclear Legacy, Strategies, and the NDA." *Journal of Nuclear Fuel Cycle and Waste Technology(JNFCWT)* 19 (3): 387–419. <https://doi.org/10.7733/jnfcwt.2021.19.3.387>.
- Haraldsen, Stephen. 2018. "The Fall and Rise of State Capabilities in the Management of the UK Nuclear Legacy." *International Journal of Public Administration* 42 (11): 918–28. <https://doi.org/10.1080/01900692.2018.1523188>.
- Holliday, Steve, HM Government, and Energy & Industrial Strategy Department for Business. 2021. *Report of the Holliday Inquiry: Inquiry into Award of the Magnox Decommissioning Contract by the Nuclear Decommissioning Authority, Related Litigation and Its Subsequent Termination*. [https://assets.publishing.service.gov.uk/government/uploads/system/uploads/attachment\\_data/file/966572/The\\_Holliday\\_Inquiry.pdf](https://assets.publishing.service.gov.uk/government/uploads/system/uploads/attachment_data/file/966572/The_Holliday_Inquiry.pdf).
- House of Commons. 2020. "The Nuclear Decommissioning Authority's Management of the Magnox Contract." HC 653. London: House of Commons, Committee of Public Accounts. <https://publications.parliament.uk/pa/cm5801/cmselect/cmpubacc/653/653.pdf>.
- IAEA. 2005. "Selection of Decommissioning Strategies: Issues and Factors." Report by an expert group IAEA-TECDOC-1478. Vienna: International Atomic Energy Agency. [https://www-pub.iaea.org/MTCD/Publications/PDF/TE\\_1478\\_web.pdf](https://www-pub.iaea.org/MTCD/Publications/PDF/TE_1478_web.pdf).
- Irrek, Wolfgang. 2019. "Financing Nuclear Decommissioning." In *The Technological and Economic Future of Nuclear Power*, edited by Reinhard Haas, Lutz Mez, and Amela Ajanovic, 139–68. Energiepolitik Und Klimaschutz. Energy Policy and Climate Protection. Wiesbaden: Springer VS. [https://doi.org/10.1007/978-3-658-25987-7\\_12](https://doi.org/10.1007/978-3-658-25987-7_12).
- Lal, Hamish. 2013. "Nuclear Decommissioning Contracts: The Legal and Commercial Issues." *Proceedings of the Institution of Civil Engineers - Management, Procurement and Law* 166 (2): 94–102. <https://doi.org/10.1680/mpal.10.00016>.
- Lordan-Perret, Rebecca, Robert D. Sloan, and Robert Rosner. 2021. "Decommissioning the U.S. Nuclear Fleet: Financial Assurance, Corporate Structures, and Bankruptcy." *Energy Policy* 154 (July): 112280. <https://doi.org/10.1016/j.enpol.2021.112280>.
- MacKerron, Gordon. 2012. "Evaluation of Nuclear Decommissioning and Waste Management." URN 12D/002/. Science and Technology Policy Research. University of Sussex. [http://www.efn-uk.org/l-street/politics-lib/nuclear-reports/index\\_files/DECC-MacKerron-nucwaste.pdf](http://www.efn-uk.org/l-street/politics-lib/nuclear-reports/index_files/DECC-MacKerron-nucwaste.pdf).
- . 2015. "Multiple Challenges - Nuclear Waste Governance in the United Kingdom." In *Nuclear Waste Governance. An International Comparison*, edited by Lutz Mez and Achim Brunnengräber, 101–16. Wiesbaden: Springer VS.
- MacMillan, Douglas. 2022. "The Dangerous Business of Dismantling America's Aging Nuclear Plants." *The Washington Post*, May 13, 2022. <https://www.washingtonpost.com/business/2022/05/13/holtec-oyster-creek-nuclear-plant-cleanup/>.
- Moriarty, Julia A. 2021. "2021 Nuclear Decommissioning Funding Study." Callan Institute. <https://www.callan.com/blog-archive/2021-nuclear-decommissioning-funding/>.
- NAO. 2015. "Progress on the Sellafield Site: An Update." Report by the Comptroller and Auditor General. London: National Audit Office. <https://www.nao.org.uk/wp-content/uploads/2015/03/Progress-on-the-Sellafield-Site-an-update.pdf>.

## References (con't)

- NDA. 2014. "Sellafield Options. Outline Business Case." ST/STY(14)0078. Sellafield: Nuclear Decommissioning Authority. <https://webarchive.nationalarchives.gov.uk/ukgwa/20211004154112/https://rwm.nda.gov.uk/publication/sellafield-options-outline-business-case-november-2014/>.
- . 2021. "Strategy - Effective from March 2021." Cumbria: Nuclear Decommissioning Authority.
- NRC. 2021. "NRC Approves Proposed Rule on Regulatory Improvements for Nuclear Power Plants Transitioning to Decommissioning." Press release. NRC News. Washington, DC: United States Nuclear Regulatory Commission. <https://www.nrc.gov/reading-rm/doc-collections/news/2021/21-043.pdf>.
- OECD/NEA. 2006. "Decommissioning Funding: Ethics, Implementation, Uncertainties."
- . 2016. "Costs of Decommissioning Nuclear Power Plants." Paris: Nuclear Energy Agency / Organisation for Economic Co-operation and Development.
- Park, Kwangheon, Seunghyun Son, Jinhyuk Oh, and Sunkuk Kim. 2022. "Sustainable Decommissioning Strategies for Nuclear Power Plants: A Systematic Literature Review." *Sustainability* 14 (10): 5947. <https://doi.org/10.3390/su14105947>.
- Rhodes, Christopher, David Hough, and Louise Butcher. 2014. "Privatisation." Research Paper 14/61. London: House of Commons Library. <https://commonslibrary.parliament.uk/research-briefings/rp14-61/>.
- Schneider, Mycle, Antony Froggatt, Julie Hazemann, Ali Ahmad, Mariana Budjeryn, Yuichi Kaido, Naoto Kan, et al. 2021. "World Nuclear Industry Status Report 2021." Paris: Mycle Schneider Consulting. <https://www.worldnuclearreport.org/IMG/pdf/wnisr2021-lr.pdf>.
- Schneider, Mycle, Antony Froggatt, Julie Hazemann, Ali Ahmad, Tadahiro Katsuta, M.V. Ramana, Ben Wealer, Agnès Stienne, and Friedhelm Meinass. 2020. "World Nuclear Industry Status Report 2020." Paris: Mycle Schneider Consulting. <https://www.worldnuclearreport.org/-World-Nuclear-Industry-Status-Report-2020-.html>.
- Schneider, Mycle, Antony Froggatt, Julie Hazemann, Christian von Hirschhausen, M.V. Ramana, Alexander James Wimmers, Michael Sailer, et al. 2022. "World Nuclear Industry Status Report 2022." Paris: Mycle Schneider Consulting. <https://www.worldnuclearreport.org/IMG/pdf/wnisr2022-hr.pdf>.
- Schneider, Mycle, Antony Froggatt, Julie Hazemann, Tadahiro Katsuta, Amory B. Lovins, M. V. Ramana, Christian von Hirschhausen, and Ben Wealer. 2019. "World Nuclear Industry Status Report 2019." Paris, London: Mycle Schneider Consulting.
- Schneider, Mycle, Antony Froggatt, Phil Johnstone, Andy Stirling, Tadahiro Katsuta, M. V. Ramana, Christian von Hirschhausen, Ben Wealer, Agnès Stienne, and Julie Hazemann. 2018. "World Nuclear Industry Status Report 2018." Paris, London: Mycle Schneider Consulting.
- Sellafield Ltd. 2017. "Corporate Plan 2016/17-2036." Corporate Report. Sellafield. [https://assets.publishing.service.gov.uk/government/uploads/system/uploads/attachment\\_data/file/627566/SEL11098\\_corporate-plan\\_web.pdf](https://assets.publishing.service.gov.uk/government/uploads/system/uploads/attachment_data/file/627566/SEL11098_corporate-plan_web.pdf).
- STENFO. 2020. "Stilllegungs fonds Für Kernanlagen Und Entsorgungsfonds Für Kernkraftwerke STENFO." 2020. <https://www.stenfo.ch/de/Home>.
- Stenger, Daniel F., Amy C. Roma, and Sachin S. Desai. 2019. "Innovations in Decommissioning and Their Application Abroad." *Nuclear News* 62 (8): 45–52.
- Suh, Young A, Carol Hornibrook, and Man-Sung Yim. 2018. "Decisions on Nuclear Decommissioning Strategies: Historical Review." *Progress in Nuclear Energy* 106 (July): 34–43. <https://doi.org/10.1016/j.pnucene.2018.02.001>.
- Wealer, Ben, Simon Bauer, Nicolas Landry, Hannah Seiß, and Christian von Hirschhausen. 2018. "Nuclear Power Reactors Worldwide – Technology Developments, Diffusion Patterns, and Country-by-Country Analysis of Implementation (1951–2017)." Data Documentation 93. Berlin: DIW Berlin, TU Berlin.
- Wealer, Ben, and Christian von Hirschhausen. 2020. "Nuclear Power as a System Good. Organizational Models for Production Along the Value- Added Chain." DIW Discussion Paper 1883. Berlin, Germany: DIW Berlin.
- Wealer, Ben, Jan Paul Seidel, and Christian von Hirschhausen. 2019. "Decommissioning of Nuclear Power Plants and Storage of Nuclear Waste: Experiences from Germany, France, and the U.K." In *The Technological and Economic Future of Nuclear Power*, edited by Reinhard Haas, Lutz Mez, and Amela Ajanovic, 261–86. Wiesbaden: Springer VS. [https://doi.org/10.1007/978-3-658-25987-7\\_12](https://doi.org/10.1007/978-3-658-25987-7_12).
- Weinand, Katrin. 2022. "Rückbau kerntechnischer Anlagen in Deutschland - Zwischen Standardisierung und Einzelfallunterscheidung." Master Thesis, Karlsruhe, Germany: Karlsruher Institut für Technologie (KIT).
- Wimmers, Alexander, Rebekka Bärenbold, Muhammad Maladoh Bah, Rebecca Lordan-Perret, Björn Steigerwald, Christian von Hirschhausen, Hannes Weigt, and Ben Wealer. 2023. "Decommissioning of Nuclear Power Plants: Regulation, Financing, and Production." DIW Data Documentation 104. Berlin: DIW Berlin, German Institute for Economic Research. [https://www.diw.de/documents/publikationen/73/diw\\_01.c.864222.de/diw\\_datadoc\\_2023-104.pdf](https://www.diw.de/documents/publikationen/73/diw_01.c.864222.de/diw_datadoc_2023-104.pdf).

## Background research is freely accessible

**DIW Data Documentation 104:** Decommissioning of Nuclear Power Plants: Regulation, Financing, and Production

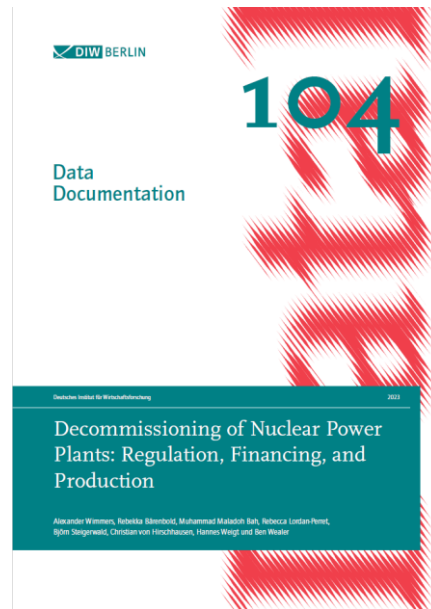

[https://dx.doi.org/10.18723/diw\\_ddc:2023-104](https://dx.doi.org/10.18723/diw_ddc:2023-104)

**IAEE Webinar:** Decommissioning of Nuclear Power Plants: A New Challenge of Energy Economics

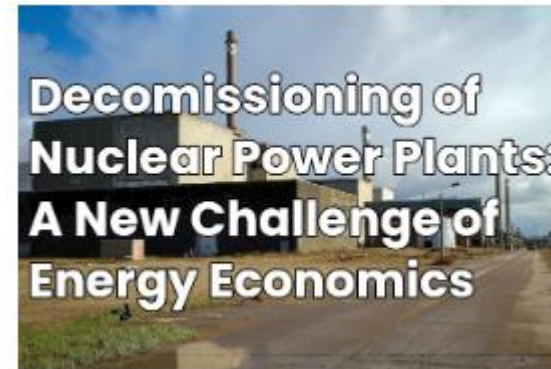

[https://www.iaee.org/en/webinars/webinar\\_cvh.aspx](https://www.iaee.org/en/webinars/webinar_cvh.aspx)

<https://www.youtube.com/watch?v=xZPUqKgAScs>

This research is funded by Swiss National Science Foundation (SNSF) and the Deutsche Forschungsgemeinschaft (DFG), grant number 100018L 185154.

# Thank you for your attention!

**Alexander Wimmers**

Workgroup for Infrastructure Policy (WIP)  
Technische Universität (TU) Berlin  
Straße des 17. Juni 135  
10623 Berlin  
Germany

Online: [tu.berlin/wip](https://tu.berlin/wip)  
E-Mail: [awi@wip.tu-berlin.de](mailto:awi@wip.tu-berlin.de)  
Tel.: +49 30 314 758 37

# Technical Process

## Three-Stage Classification

### Warm-Up-Stage

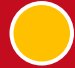

- Removal of spent fuel (“Defueling”)
- Overview of contaminated inventory
- Removal of all machines and components that are not needed for hot-zone dismantling
- Set-up of technical and logistical infrastructure for hot-zone tasks
- Dismantling of contaminated machinery, such as steam generator
- Preparation of dismantling of strongly contaminated components and machinery

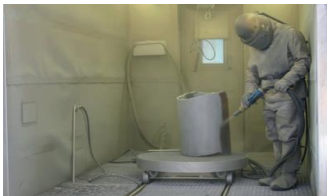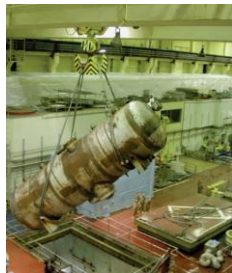

### Hot-Zone-Stage

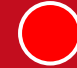

- Dismantling of strongly contaminated machinery and components, such as reactor pressure vessel or biological shield

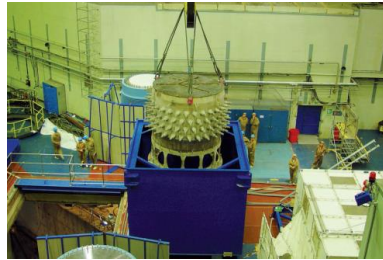

Remote underwater cutting

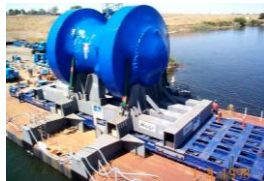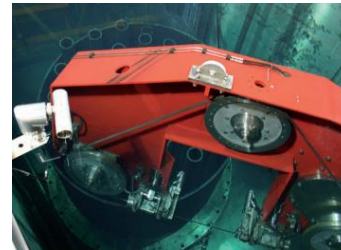

„One piece“ dismantling

### Ease-Off-Stage

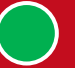

- Dismantling of remaining components and machinery
- Decontamination of buildings
- **Release from regulatory oversight**
- Demolition of buildings
  - **Greenfield:** Site released to be used in non-industrial (and non-nuclear!) context
  - **Brownfield:** Site released for industrial use, e.g., further electricity generation or interim storage facility for nuclear waste.

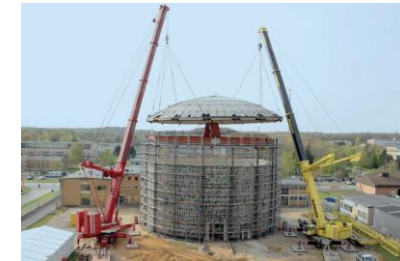

Sources: Schneider et al. (2022), Images: Brendebach et al. (2017)

# Current Status of Decommissioning Efforts

Nuclear decommissioning is ongoing worldwide, 204 reactors are closed

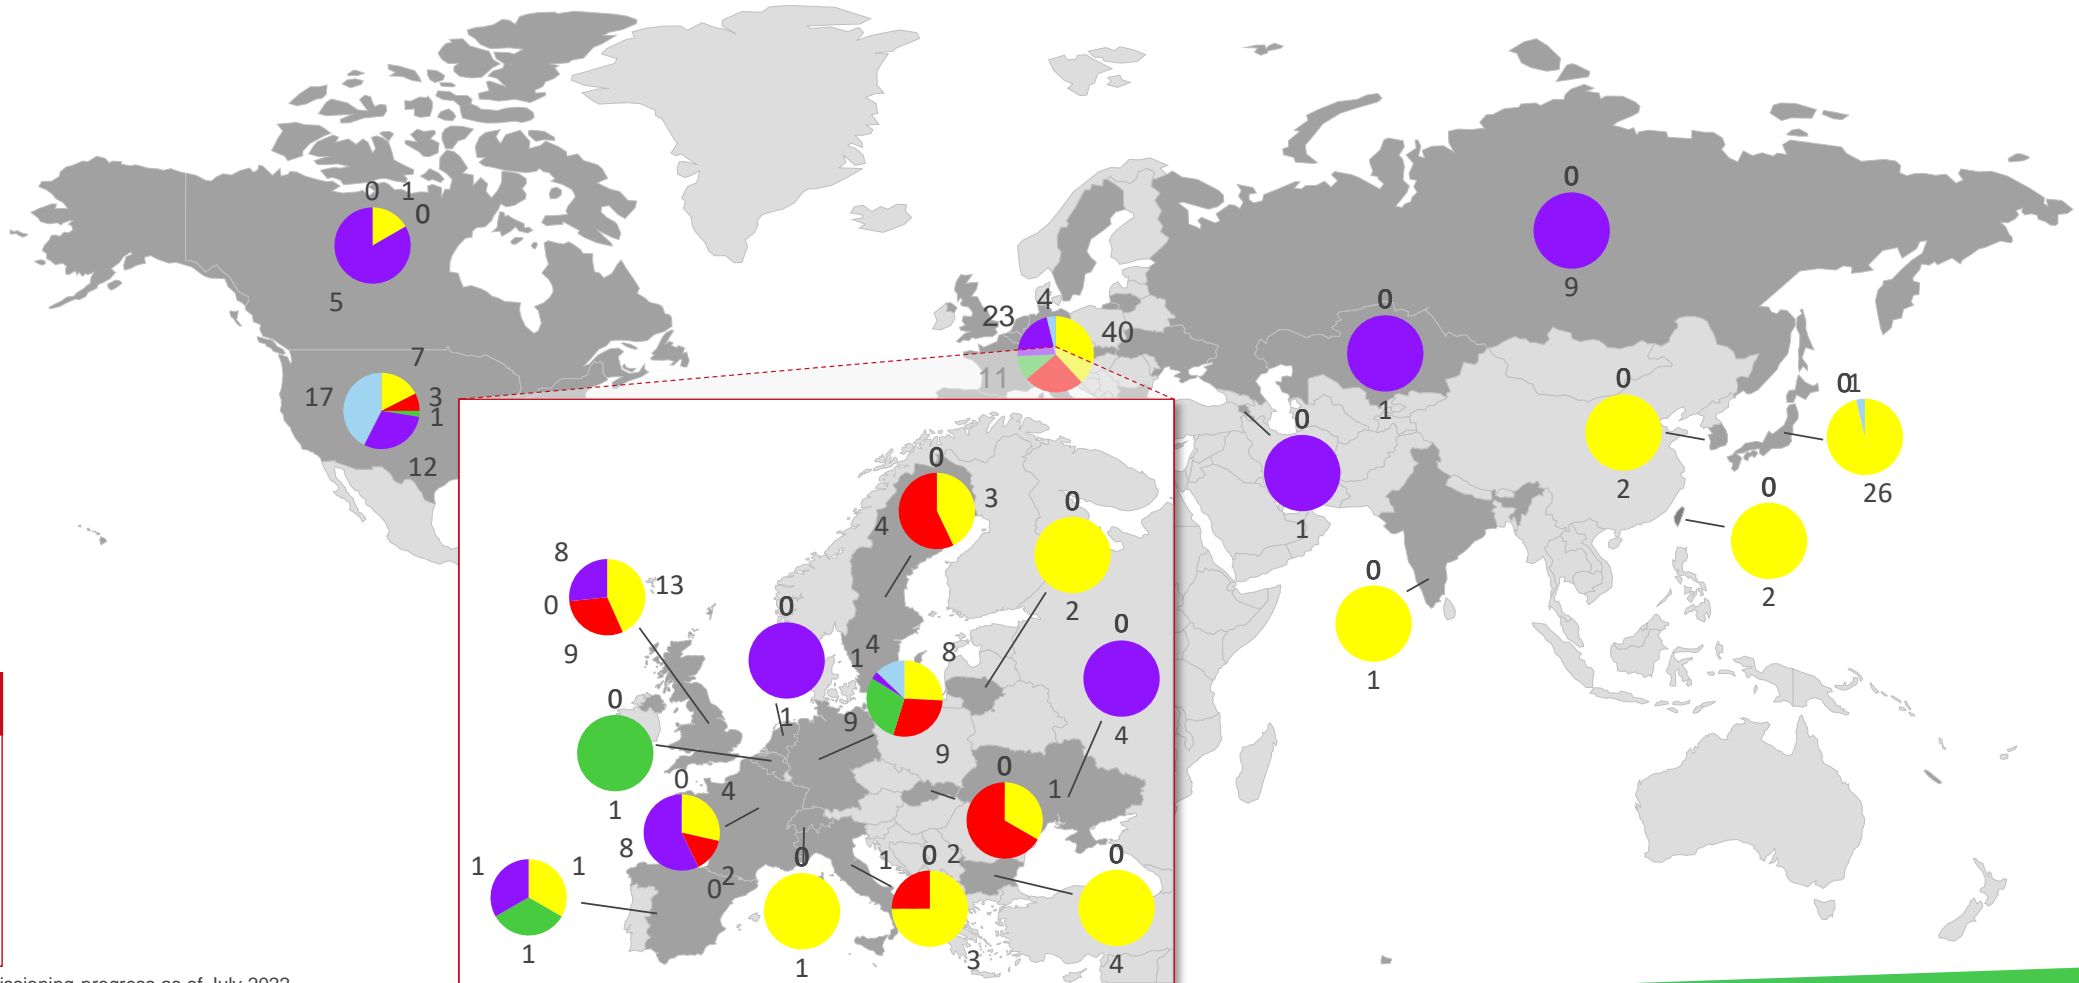

| Key                                   |           |
|---------------------------------------|-----------|
| <span style="color: yellow;">■</span> | Warm-Up   |
| <span style="color: red;">■</span>    | Hot-Zone  |
| <span style="color: green;">■</span>  | Ease-Off  |
| <span style="color: purple;">■</span> | LTE       |
| <span style="color: blue;">■</span>   | Completed |

State of nuclear decommissioning progress as of July 2022.  
Source: Schneider et al. (2022)

# System Good Nuclear Decommissioning

Processes and Assets following Wealer and von Hirschhausen (2020, p. 46)

| Stage           | Processes                                                                                                                                                                                                                                                                                                                                                                                                                                                                                       | Assets                                                                                                                                                                                                                                                                                                                     |
|-----------------|-------------------------------------------------------------------------------------------------------------------------------------------------------------------------------------------------------------------------------------------------------------------------------------------------------------------------------------------------------------------------------------------------------------------------------------------------------------------------------------------------|----------------------------------------------------------------------------------------------------------------------------------------------------------------------------------------------------------------------------------------------------------------------------------------------------------------------------|
| <b>Warm-Up</b>  | <ul style="list-style-type: none"> <li>• Defueling of the reactor core and the spent fuel pools</li> <li>• Decontamination work</li> <li>• Dismantling of first redundant systems</li> <li>• Installation of logistics in the hot zone</li> <li>• Dismantling of higher contaminated plant components (e.g., steam generator and parts of the primary cooling circuit)</li> <li>• Conditioning work of operational wastes and spent fuel (Loading the spent fuel into storage casks)</li> </ul> | <ul style="list-style-type: none"> <li>• Transport and storage casks</li> <li>• Decontamination tools</li> <li>• Transport logistic</li> <li>• Logistic for handling hot-zone work</li> <li>• Interim storage facility</li> <li>• Disposal facility (or access to)</li> </ul>                                              |
| <b>Hot-Zone</b> | <ul style="list-style-type: none"> <li>• Dismantling of the reactor pressure vessel</li> <li>• Dismantling of the reactor pressure vessel internals</li> <li>• Dismantling of the biological shield</li> <li>• Dismantling of the cooling circuit</li> </ul>                                                                                                                                                                                                                                    | <ul style="list-style-type: none"> <li>• Transport and storage casks</li> <li>• Decontamination tools</li> <li>• Transport logistic</li> <li>• Logistic for handling hot-zone work</li> <li>• Interim storage facility</li> <li>• Highly specific tools for reactor dismantling (e.g., under water manipulator)</li> </ul> |
| <b>Ease-Off</b> | <ul style="list-style-type: none"> <li>• Removal of operating systems</li> <li>• Decontamination of the buildings</li> <li>• (ideally) the demolition of the buildings</li> <li>• Conditioning works</li> <li>• Site remediation</li> </ul>                                                                                                                                                                                                                                                     | <ul style="list-style-type: none"> <li>• Transport and storage casks</li> <li>• Decontamination tools</li> <li>• Transport logistic</li> <li>• Logistic for handling hot-zone work</li> <li>• Interim storage facility</li> <li>• Disposal facility (or access to)</li> </ul>                                              |

# Introducing Transaction Costs to Nuclear Decommissioning

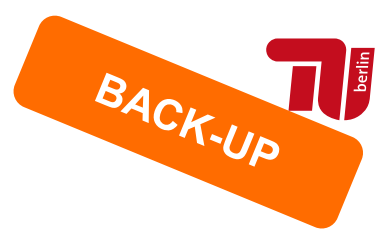

**Transaction costs:** Transaction costs are real resources that are required to create and operate an institution. They are not directly linked to value creation but occur when goods and services are transferred across separable interfaces. (Williamson, 1979, 1985)

## Dimensions of Transactions in Nuclear Decommissioning

### Uncertainty

- Unknown degree of on-site radiological contamination of buildings and components
- Structural integrity of ageing concrete structures
- ...

### Frequency

- Achievability of economies of scale through repetition of tasks and standardization uncertain
- Economies of scope limited due to complexity of radiation management
- ...

### Asset Specificity

- Diverse nuclear power plant fleet structures limit standardization possibilities
- Historical neglect of decommissioning necessity during construction
- Specialized tools necessary
- ....



# Nuclear Decommissioning in the United Kingdom

## Sellafield Fees following NAO (2015)

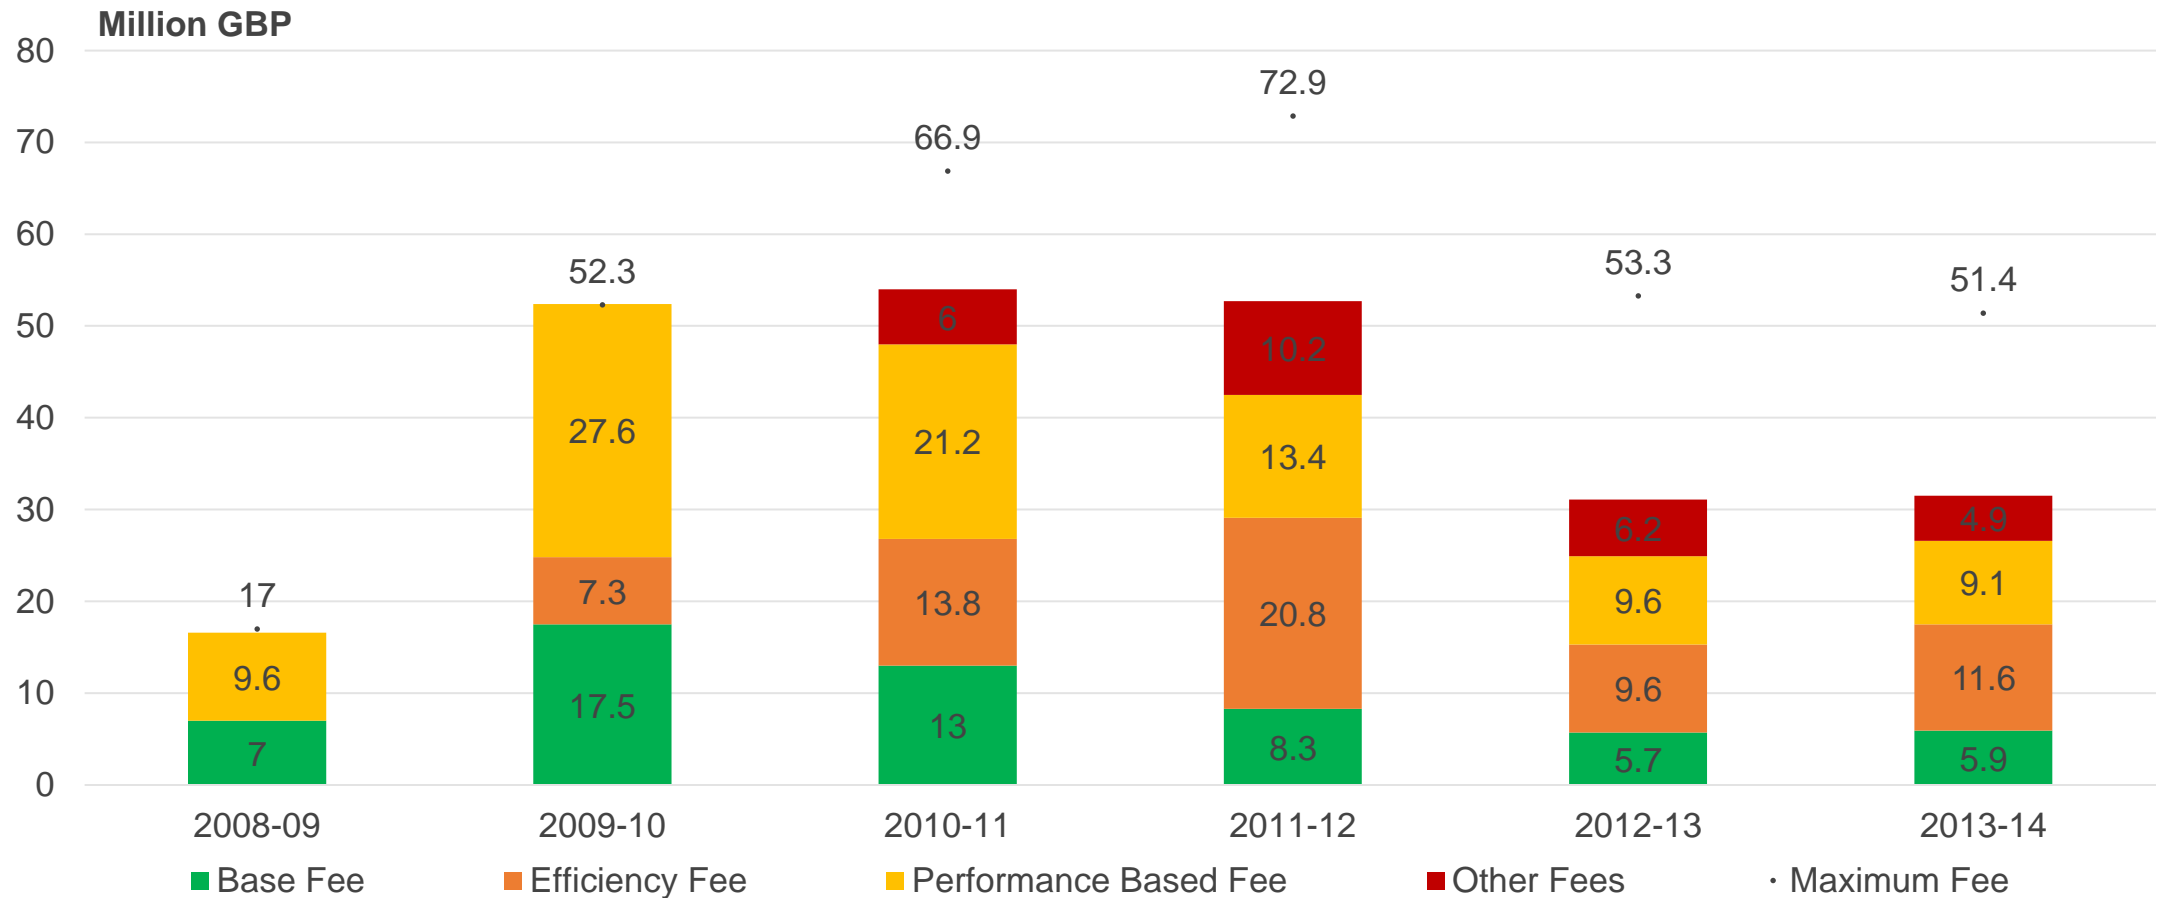

# Nuclear Decommissioning Organization in the United Kingdom

## Some Transaction Costs in the PBO scheme

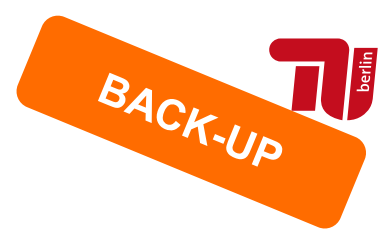

| Ex-ante TAC                                                                                                                                                                                                                                                                                                                                                                                                                                                                      | Ex-Post TAC                                                                                                                                                                                                                                                                                                                                                                                                                                                                             |
|----------------------------------------------------------------------------------------------------------------------------------------------------------------------------------------------------------------------------------------------------------------------------------------------------------------------------------------------------------------------------------------------------------------------------------------------------------------------------------|-----------------------------------------------------------------------------------------------------------------------------------------------------------------------------------------------------------------------------------------------------------------------------------------------------------------------------------------------------------------------------------------------------------------------------------------------------------------------------------------|
| <p><b>Tendering and Contracts</b></p> <ul style="list-style-type: none"> <li>- Defining criteria</li> <li>- Setting up tendering process (weighting of criteria)</li> <li>- Screening of competitors</li> <li>- Contract design</li> <li>- Transfer of knowledge and property rights to new PBO</li> </ul>                                                                                                                                                                       | <p><b>Tendering and Contracts</b></p> <ul style="list-style-type: none"> <li>- Defense against litigation: establishment of checks and balances to avoid false awarding</li> </ul>                                                                                                                                                                                                                                                                                                      |
| <p><b>Monitoring</b></p> <p>Technical goals: “setting the baseline”</p> <ul style="list-style-type: none"> <li>- Gathering necessary information from SLCs</li> <li>- Definition of tasks that can reasonably be completed</li> </ul> <p><b>Target Cost Approach</b></p> <ul style="list-style-type: none"> <li>- Setting incentive: fee to be earned</li> <li>- Determining reasonable target cost for previously determined baseline</li> <li>- bargaining with PBO</li> </ul> | <p><b>Monitoring</b></p> <ul style="list-style-type: none"> <li>- Target monitoring</li> <li>- Evaluation of contract extension requisites</li> <li>- Reimbursement approach: are claims viable?</li> <li>- target cost: monitoring during the process and at the end?</li> <li>- New PBO beting potential lack of trust from on-site workers that may suspect lay-offs</li> <li>- For the return of assets at the end of the contract, the state of sites must be evaluated</li> </ul> |

# Nuclear Decommissioning Organization in the United Kingdom

## Some Transaction Costs in the Market-Enhanced Model

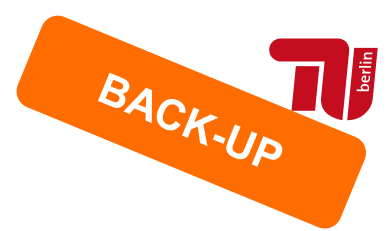

### Market Enhanced Model

- ~ costs of discovery between NDA and SLC
- ~ monitoring of efforts from SLCs by NDA
- ~ knowledge transfer between SLCs, sites and NDA

# Nuclear Decommissioning Organization in the United States

## License Stewardship and License Acquisition

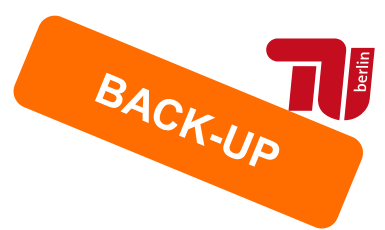

| <u>License stewardship</u>                                                                                                                                                                                                                                                                                                                              |                                                                                                                                                                                                                                                                                             |
|---------------------------------------------------------------------------------------------------------------------------------------------------------------------------------------------------------------------------------------------------------------------------------------------------------------------------------------------------------|---------------------------------------------------------------------------------------------------------------------------------------------------------------------------------------------------------------------------------------------------------------------------------------------|
| Ex-ante                                                                                                                                                                                                                                                                                                                                                 | Ex-post                                                                                                                                                                                                                                                                                     |
| <ul style="list-style-type: none"> <li>- Contract negotiation</li> <li>- Delivery, progress milestone?</li> <li>- Discovery</li> </ul>                                                                                                                                                                                                                  | <ul style="list-style-type: none"> <li>- Return of license and remaining DTF funds</li> <li>- Possible monitoring by utility after return of</li> </ul>                                                                                                                                     |
| <u>License acquisition</u>                                                                                                                                                                                                                                                                                                                              |                                                                                                                                                                                                                                                                                             |
| Ex-ante                                                                                                                                                                                                                                                                                                                                                 | Ex-post                                                                                                                                                                                                                                                                                     |
| <ul style="list-style-type: none"> <li>- Discovery from both parties                             <ul style="list-style-type: none"> <li>o Status of site</li> <li>o State of DTF (estimated value)</li> <li>o Determination of incentives: Can surplus DTF funds be accessed by decommissioning company?</li> </ul> </li> <li>- Negotiations</li> </ul> | <ul style="list-style-type: none"> <li>- integration of knowledge from past sites to new site &lt;-&gt; knowledge transfer on-site workers to licence holder</li> <li>- establishment of new owner -&gt; beat potential lack of trust from on-site workers that suspect lay-offs</li> </ul> |
